# Supplementary material for: Enhanced urea oxidization electrocatalysis on spinel cobalt oxide nanowires via on-site electrochemical defect engineering
Source: Royal Society of Chemistry journal article supplement (doi:10.1039/d0qm01119c), 2021-01-01
Supplement: d0qm01119c1.pdf [file d0qm01119c1.pdf]

**Electronic Supplementary Information (ESI) for:**

## **Enhanced urea oxidization on spinel cobalt oxide nanowires via on-site electrochemical defect engineering**

Ming Fang\*, Wen-Bo Xu, Shun Han, Peijiang Cao, Wangying Xu, Deliang Zhu, Youming Lu, and Wenjun Liu\*

*Shenzhen Key Laboratory of Special Functional Materials, Guangdong Research Centre for Interfacial Engineering of Functional Materials, College of Materials Science and Engineering, Shenzhen University, Shenzhen 518060, China.*

**Corresponding Author**

*E-mail address:* m.fang@szu.edu.cn (M. Fang) liuwj@szu.edu.cn (W. Liu)

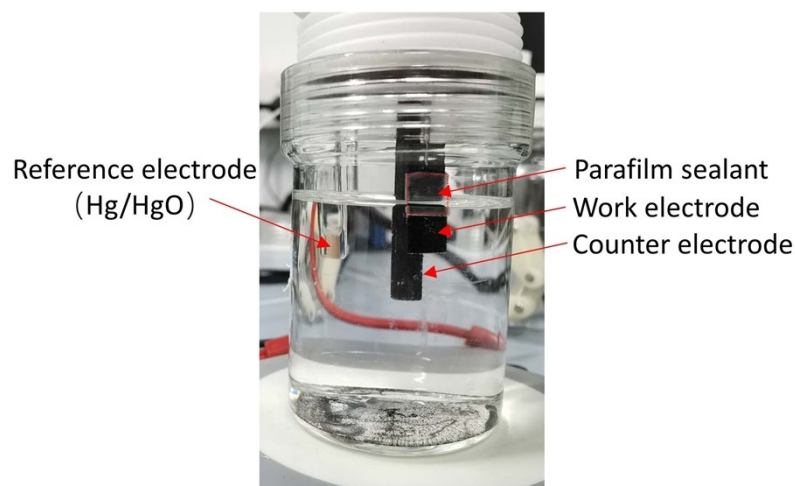

**Figure S1.** The 3-electrode electrochemical test setup.

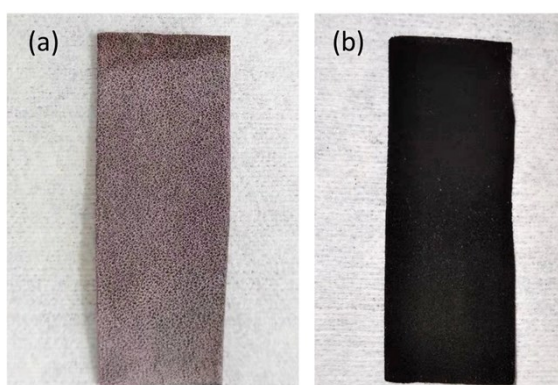

**Figure S2.** Photograph of (a) cobalt hydroxide precursor and (b) cobalt oxide supported on NF.

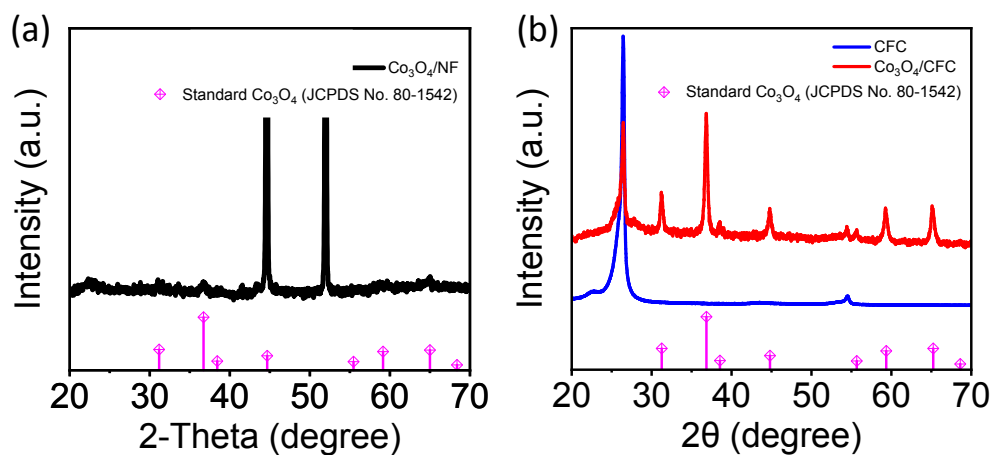

**Figure S3.** XRD pattern of  $\text{Co}_3\text{O}_4$  supported on (a) NF and (b) CFC with the reference of standard powder diffraction card.

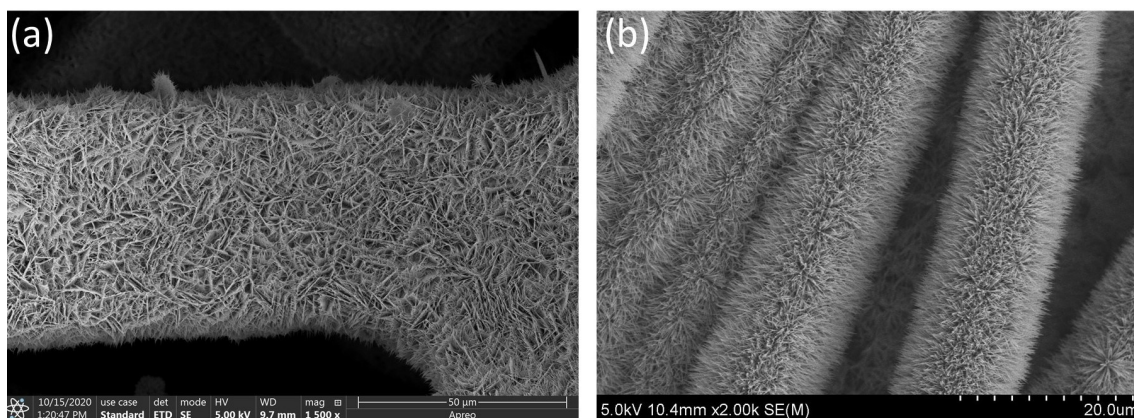

**Figure S4.** Low-magnification SEM images of  $\text{Co}_3\text{O}_4$  wire arrays supported on different substrates: (a) NF and (b) CFC.

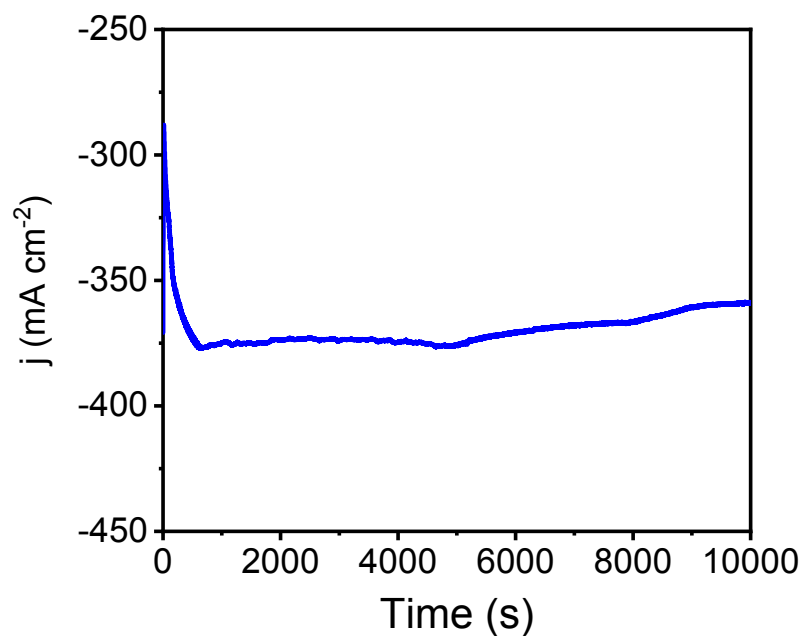

**Figure S5.** The typical chronoamperometric curve of  $\text{Co}_3\text{O}_4/\text{NF}$  corresponding to the cathodic treatment at a constant potential of -1.5 V vs. Hg/HgO.

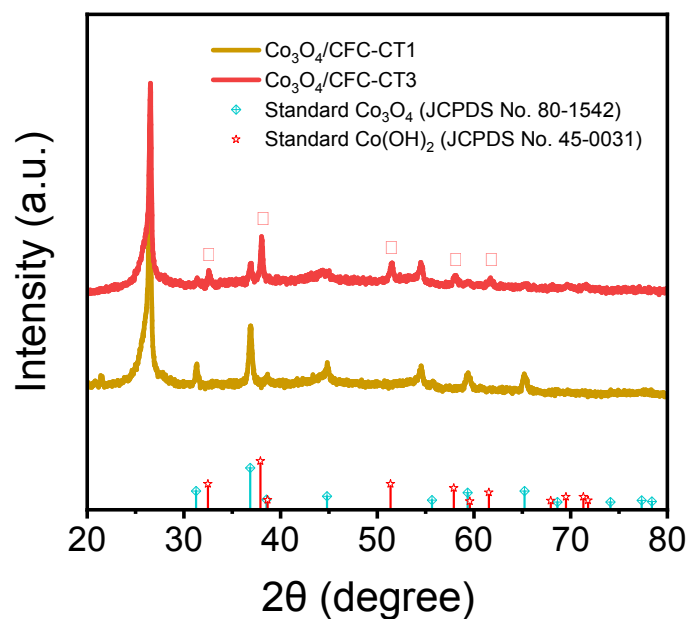

**Figure S6.** XRD patterns of  $\text{Co}_3\text{O}_4$ -CT1, and  $\text{Co}_3\text{O}_4$ -CT3 supported on CFC.

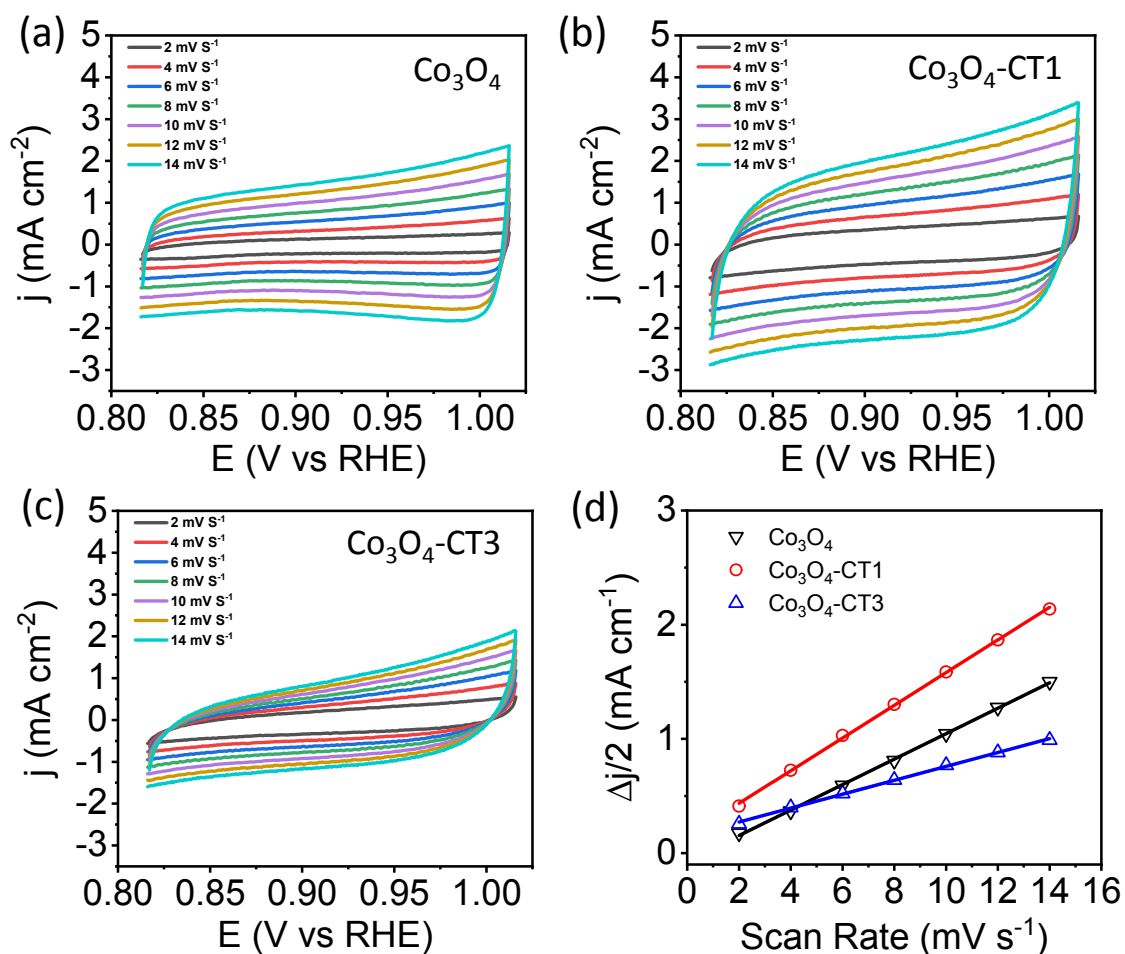

**Figure S7.** (a-c) CV curves of  $\text{Co}_3\text{O}_4$ ,  $\text{Co}_3\text{O}_4$ -CT1, and  $\text{Co}_3\text{O}_4$ -CT3 recorded with different scanning rate at the non-faradaic region; (d) linear fitting of the current density at 0.9 V vs RHE against different scan rates.

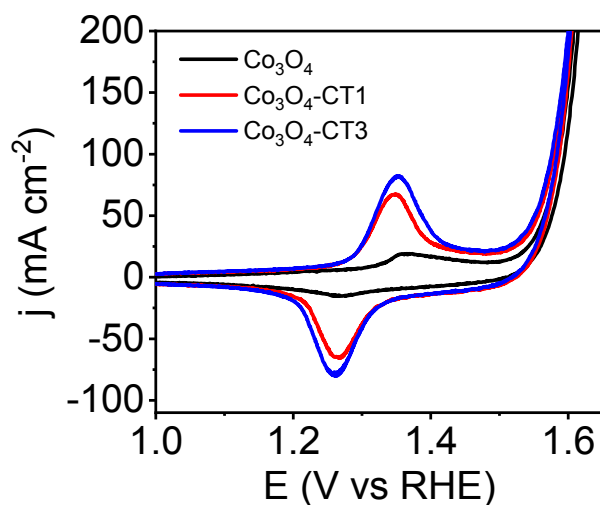

**Figure S8.** CV curves of  $\text{Co}_3\text{O}_4$ ,  $\text{Co}_3\text{O}_4\text{-CT1}$ , and  $\text{Co}_3\text{O}_4\text{-CT3}$  measured in pure 1 M KOH solution at the scan rate of 10 mV/s.

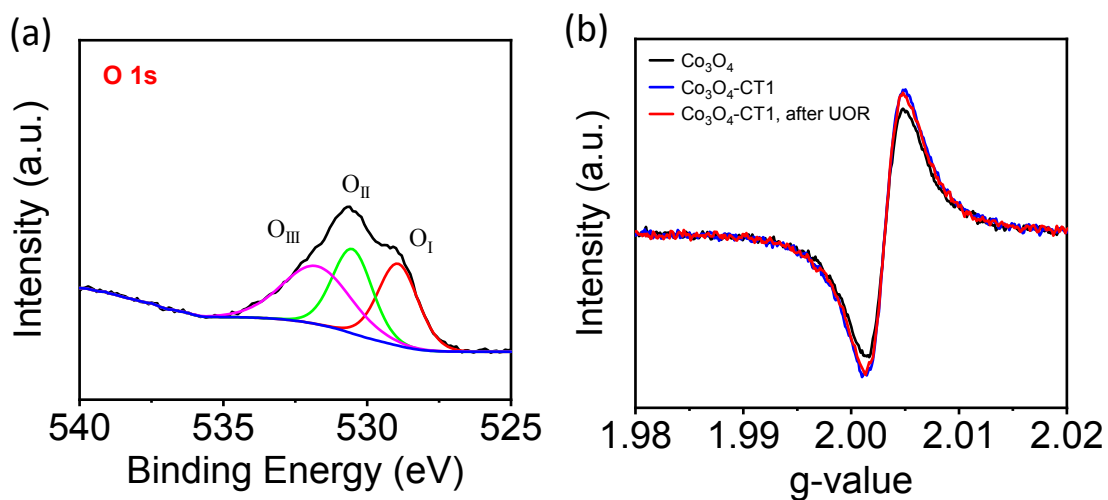

**Figure S9.** (a) O 1s spectrum of  $\text{Co}_3\text{O}_4\text{-CT1}$  after CV the V-t test for UOR, and (b) EPR spectra  $\text{Co}_3\text{O}_4\text{-CT1}$  before and after the UOR test, with  $\text{Co}_3\text{O}_4$  as a reference.

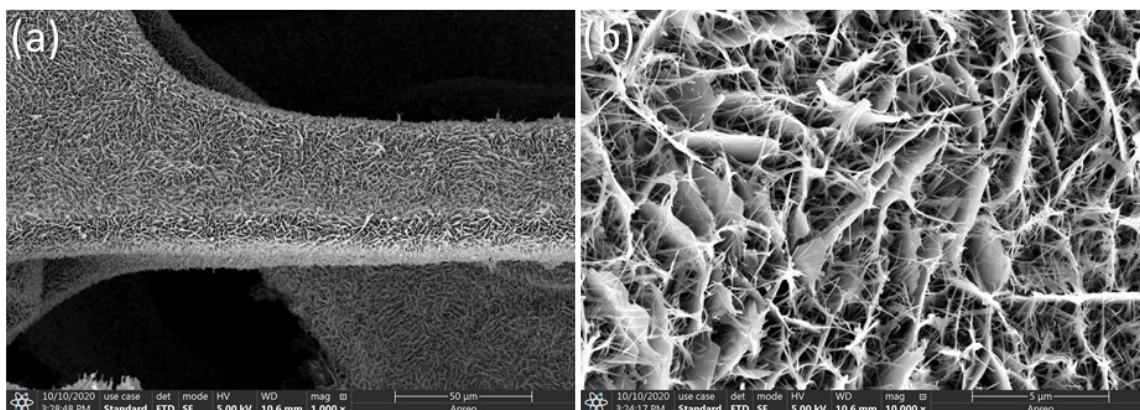

**Figure S10.** SEM images of Fe-Co<sub>3</sub>O<sub>4</sub> nanosheet/wire arrays supported on NF.

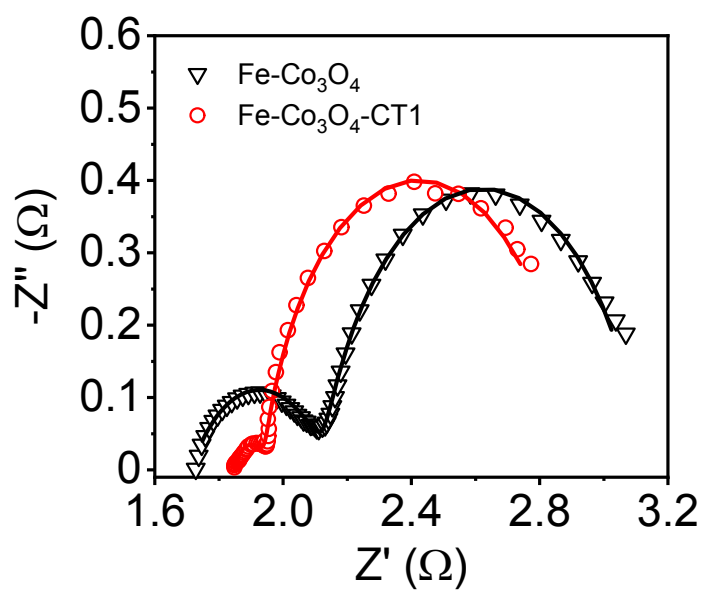

**Figure S11.** EIS spectra of Fe-Co<sub>3</sub>O<sub>4</sub> and Fe-Co<sub>3</sub>O<sub>4</sub>-CT1.



**Table S1.** Comparison of the electrocatalytic performance of UOR catalysts reported

| Catalysts                               | Substrate           | Electrolyte                     | $j$<br>(mA cm <sup>-2</sup> ) | Potential<br>(V vs. RHE) | iR-<br>Compensation | Reference                                                   |
|-----------------------------------------|---------------------|---------------------------------|-------------------------------|--------------------------|---------------------|-------------------------------------------------------------|
| CoFeCr LDH                              | Nickel foam         | 1.0 M KOH<br>0.33 M urea        | 10                            | 1.31                     | yes                 | <i>Appl. Catal. B Environ.</i> 2020, <b>272</b> ,118959.    |
| NiMoO <sub>3</sub> S                    | Nickel foam         | 1.0 M KOH<br>0.5 M urea         | 10                            | 1.34                     | yes                 | <i>Chem. Commun.</i> , 2020, <b>56</b> , 11038              |
| Rh-NCs/NiO-NSs                          | Glassy carbon       | 1.0 M KOH<br>0.33 M urea        | 52.05                         | 1.5                      | ye                  | <i>Appl. Catal. B Environ.</i> 2020, <b>265</b> , 118567    |
| <i>NiSe<sub>2</sub>-NiO 350</i>         | Glassy carbon       | 1.0 M KOH<br>0.33 M urea        | 10                            | 1.53                     | no                  | <i>Appl. Catal. B Environ.</i> 2020, <b>276</b> ,119165     |
| V <sub>O</sub> -rich CoMoO <sub>4</sub> | Nickel foam         | 1.0 M KOH<br>0.5 M urea         | 288                           | 1.63                     | unknown             | <i>Appl. Catal. A: General</i> , 2020, <b>602</b> , 117670. |
| Ni <sub>3</sub> N                       | Nickel foam         | 1.0 M KOH<br>0.5 M urea         | 100                           | 1.40                     | unknown             | <i>ACS Appl. Mater. Interfaces</i> 2019, <b>11</b> , 13168  |
| Mo-Co-S-Se                              | Carbon fiber cloth  | 1.0 M KOH<br>0.5 M urea         | 10                            | 1.40                     | unknown             | <i>ACS Sustainable Chem. Eng.</i> 2019, <b>7</b> , 16577    |
| CoS <sub>2</sub> -MoS <sub>2</sub>      | Nickel foam         | 1.0 M KOH<br>0.5 M urea         | 10                            | 1.29                     | yes                 | <i>Adv. Energy Mater.</i> 2018, <b>1801775</b>              |
| NiMoO-Ar                                | Nickel foam         | 1.0 M KOH<br>0.5 M urea         | 10<br>100                     | 1.38<br>1.42             | yes                 | <i>Energy Environ. Sci.</i> 2018, <b>11</b> , 1890          |
| <i>r-NiMoO<sub>4</sub></i>              | Nickel foam         | 1.0 M KOH<br>0.5 M urea         | 249.5                         | 1.62                     | unknown             | <i>ACS Catal.</i> 2018, <b>8</b> , 1                        |
| Ni-MOF                                  | Nickel foam         | 1.0 M KOH<br>0.33 M urea        | 10                            | 1.37                     | unknown             | <i>Chem. Commun.</i> 2017, <b>53</b> , 10906                |
| S-MnO <sub>2</sub>                      | Graphen-nickel foam | 1.0 M KOH<br>0.5 M urea         | 10                            | 1.33                     | yes                 | <i>Angew. Chemie Int. Ed.</i> 2016, <b>55</b> , 3804.       |
| <i>Rh-Ni electrode</i>                  | Nickel foil         | 1.0 M KOH<br>0.3 M urea         | 50                            | 1.40                     | unknown             | <i>J. Power Sources</i> 2011, <b>196</b> , 9579             |
| <b>Co<sub>3</sub>O<sub>4</sub>-CT1</b>  | <b>Nickel foam</b>  | <b>1.0 M KOH<br/>0.5 M urea</b> | <b>100</b>                    | <b>1.34</b>              | <b>yes</b>          | <b>This work</b>                                            |

recently.



**Table S2.** Fitting parameters obtained by the EIS spectra in Figure 3d with the proposed 2TS equivalent circuit.

| Sample                                 | $R_s$ | $R_1$  | $T_1$  | $P_1$  | $R_{ct}$ | $T_2$  | $P_2$  | $C_{dl}^{*EIS}$ |
|----------------------------------------|-------|--------|--------|--------|----------|--------|--------|-----------------|
| Co <sub>3</sub> O <sub>4</sub>         | 1.664 | 0.3338 | 0.0093 | 0.5708 | 0.6152   | 0.2704 | 0.8226 | 187.4           |
| Co <sub>3</sub> O <sub>4</sub> -CT1    | 1.663 | 0.0615 | 0.4301 | 0.5089 | 0.5290   | 0.4869 | 0.7725 | 308.4           |
| Co <sub>3</sub> O <sub>4</sub> -CT3    | 1.706 | 0.0644 | 0.7265 | 0.4895 | 0.57207  | 0.5201 | 0.7928 | 358.5           |
| Fe-Co <sub>3</sub> O <sub>4</sub>      | 1.714 | 0.4181 | 0.0062 | 0.6150 | 0.9869   | 0.2905 | 0.8454 | 221.1           |
| Fe-Co <sub>3</sub> O <sub>4</sub> -CT1 | 1.849 | 0.0931 | 0.0312 | 0.7657 | 0.9634   | 0.4036 | 0.8818 | 338.9           |

Note: a)  $C_{dl}^{*EIS}$  was calculated by using equation 2; b) units for  $R$  and  $C_{dl}^{*EIS}$  are ohm ( $\Omega$ ) and  $mF\ cm^{-2}$ , respectively.
